# Supplementary material
Source: MDPI journal article supplement (https://www.mdpi.com/2673-4583/5/1/51)

# PLANTS OF THE FAMILY ASTERACEAE: EVALUATION OF BIOLOGICAL PROPERTIES AND IDENTIFICATION OF PHENOLIC COMPOUNDS

M. Barral-Martinez<sup>1</sup>, P. Garcia-Oliveira<sup>1,2</sup>, B. Nuñez-Estevez<sup>1,2</sup>, A. Silva<sup>3,1</sup>, T. C. Finimundy<sup>2</sup>, R. Calhelha<sup>2</sup>, M. Nenadic<sup>4</sup>, M. Sokovic<sup>4</sup>, F. Barroso<sup>3</sup>, J. Simal-Gandara<sup>1</sup>, I.C.F.R. Ferreira<sup>2</sup>, L. Barros<sup>2\*</sup> and M.A. Prieto<sup>1,2\*</sup>

1 Nutrition and Bromatology Group, Faculty of Food Science and Technology, University of Vigo, Ourense Campus, E32004 Ourense, Spain.

2 Centro de Investigação de Montanha (CIMO), Instituto Politécnico de Bragança, Campus de Santa Apolónia, 5300-253 Bragança, Portugal.

3 REQUIMTE/LAQV, Instituto Superior de Engenharia do Porto, Instituto Politécnico do Porto, Rua Dr António Bernardino de Almeida 431, 4200-072 Porto, Portugal

4 Institute for Biological Research "Siniša Stanković"- National Institute of Republic of Serbia, University of Belgrade.

# Index

1. Introduction

2. Materials and methods

3. Results

4. Conclusion

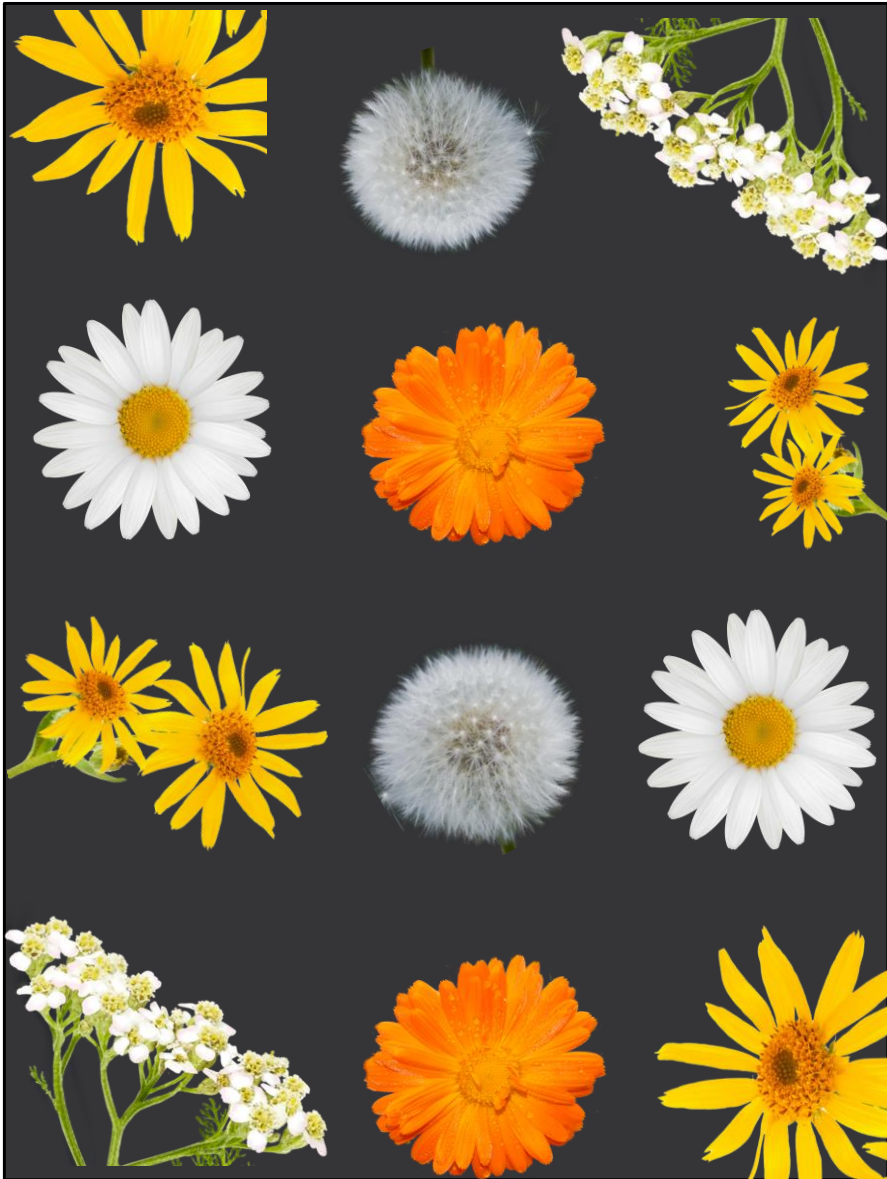

# 1. Introduction

- ❑ Medicinal plants have had a great relevance due to their beneficial healthy properties
- ❑ These biological properties → antioxidant, antitumor, antimicrobial activities are related to different bioactive compounds, including phenolic compounds
- ❑ Various natural phenolic compounds are related to numerous bioactive properties, which have aroused the interest of the scientific community

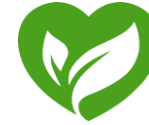

The study focused on the analysis of five medicinal plants belonging to the Asteraceae family

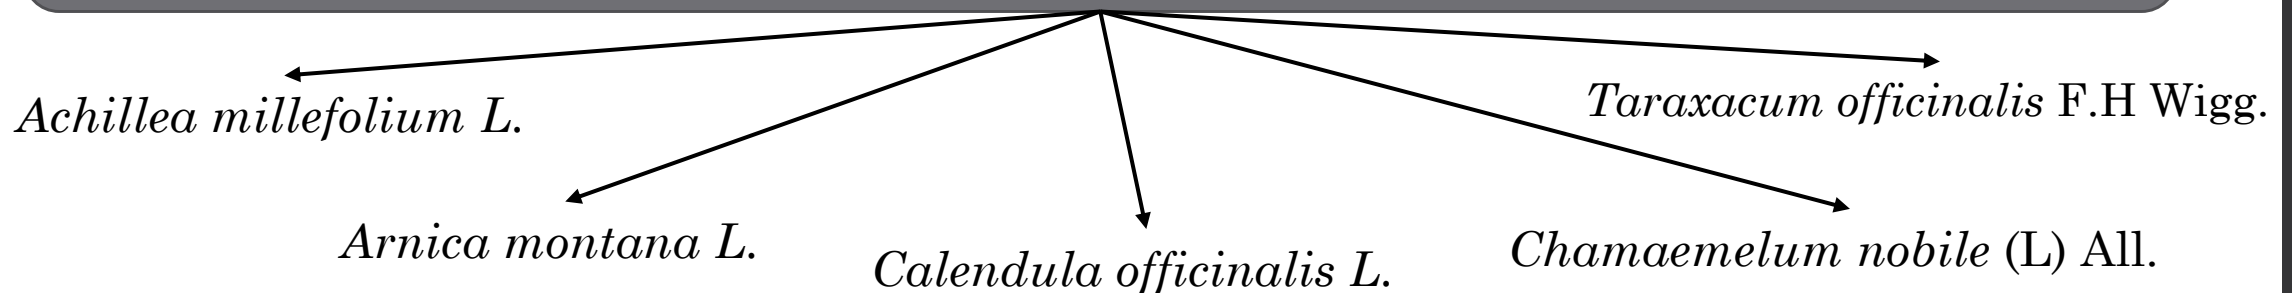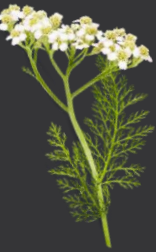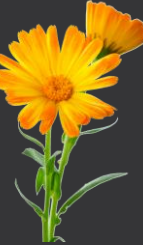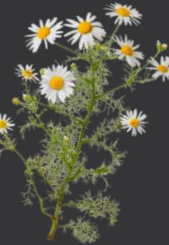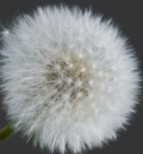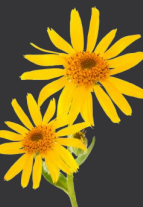

## 2. Materials and methods

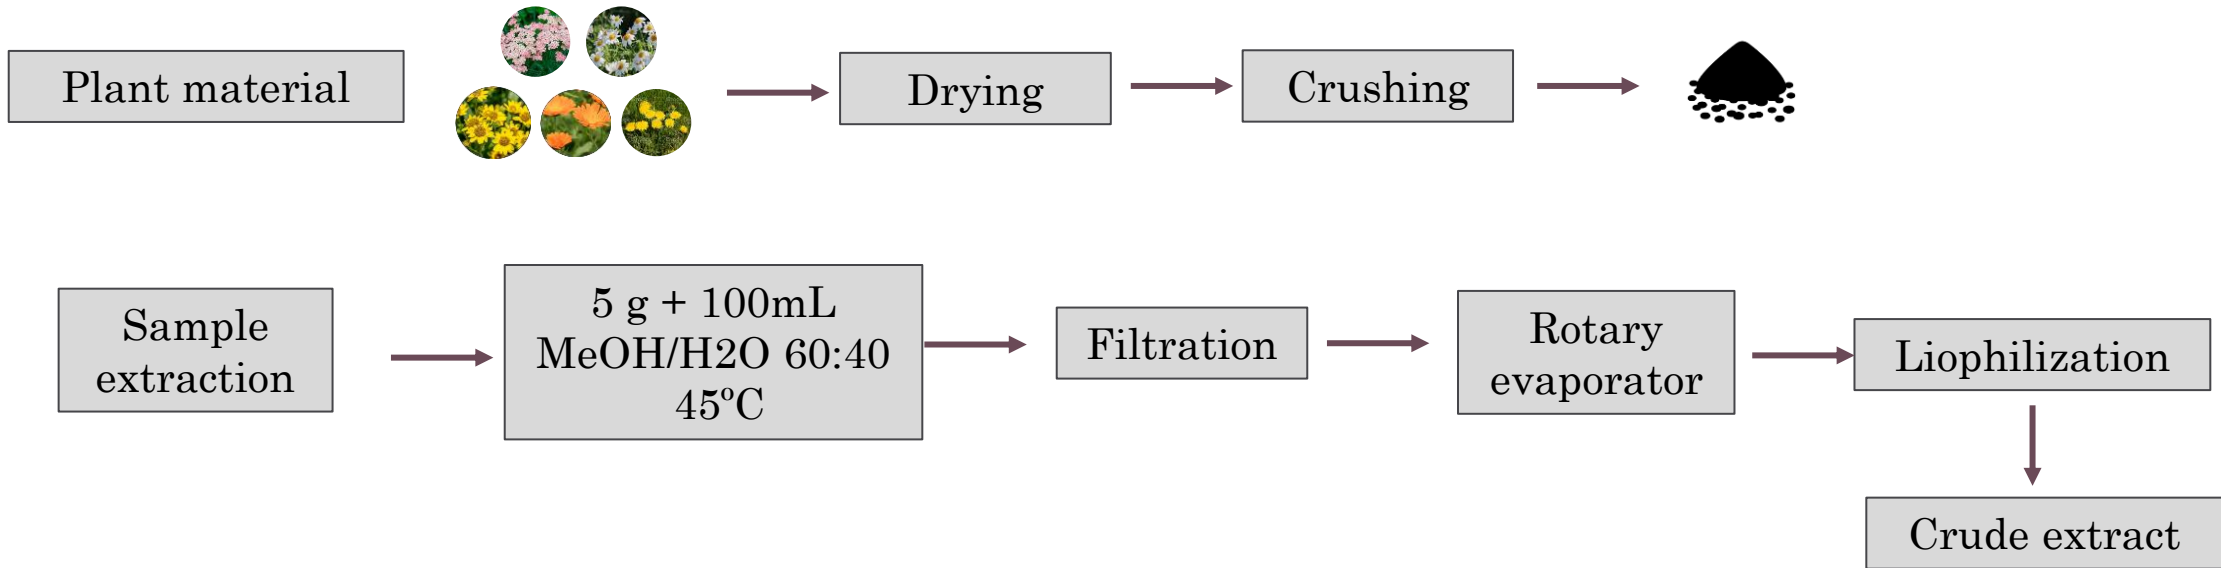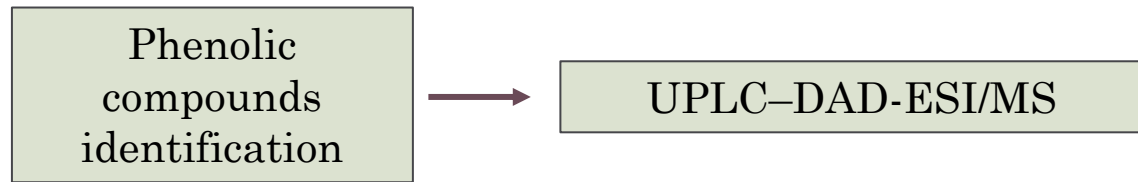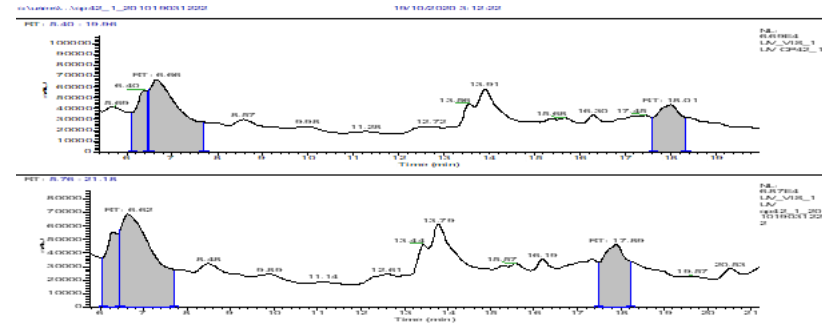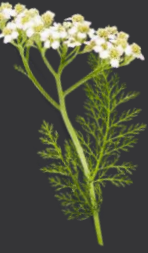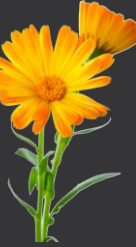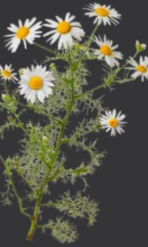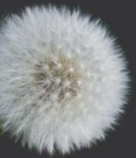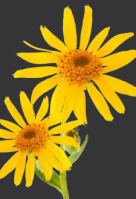

## 2. Materials and methods

Bioactivities

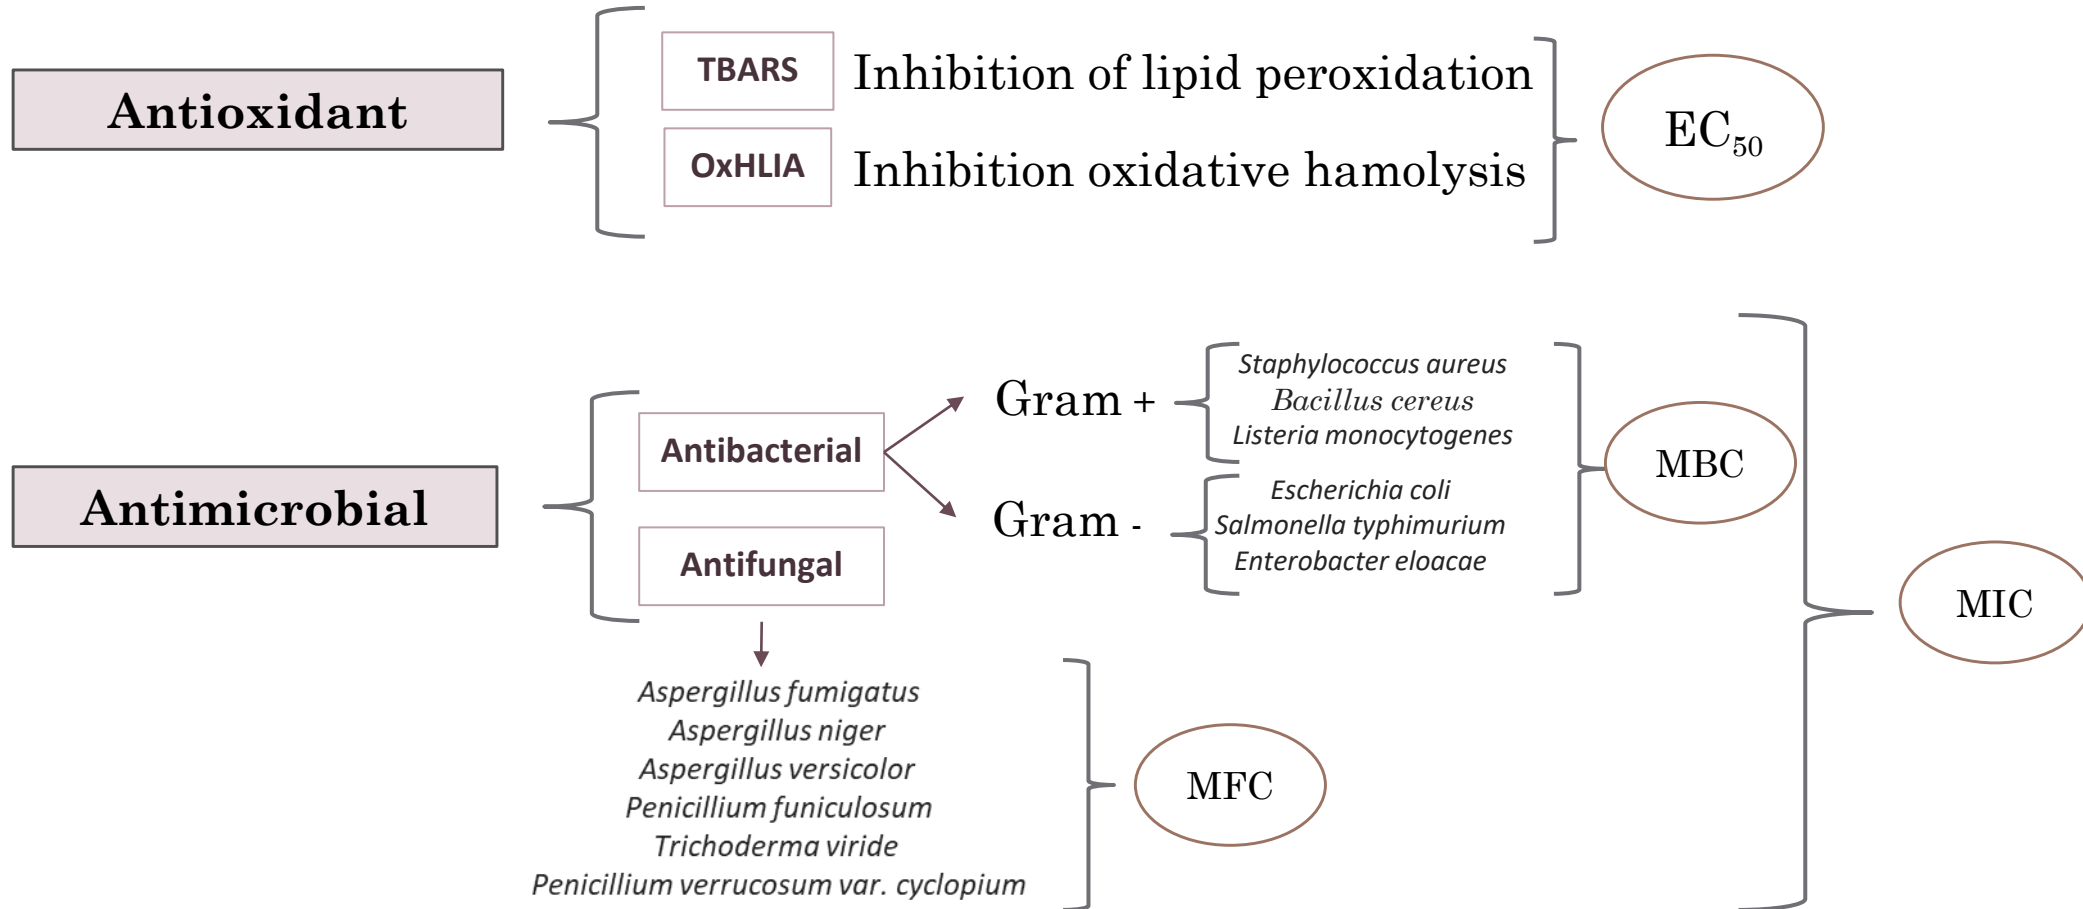

## 2. Materials and methods

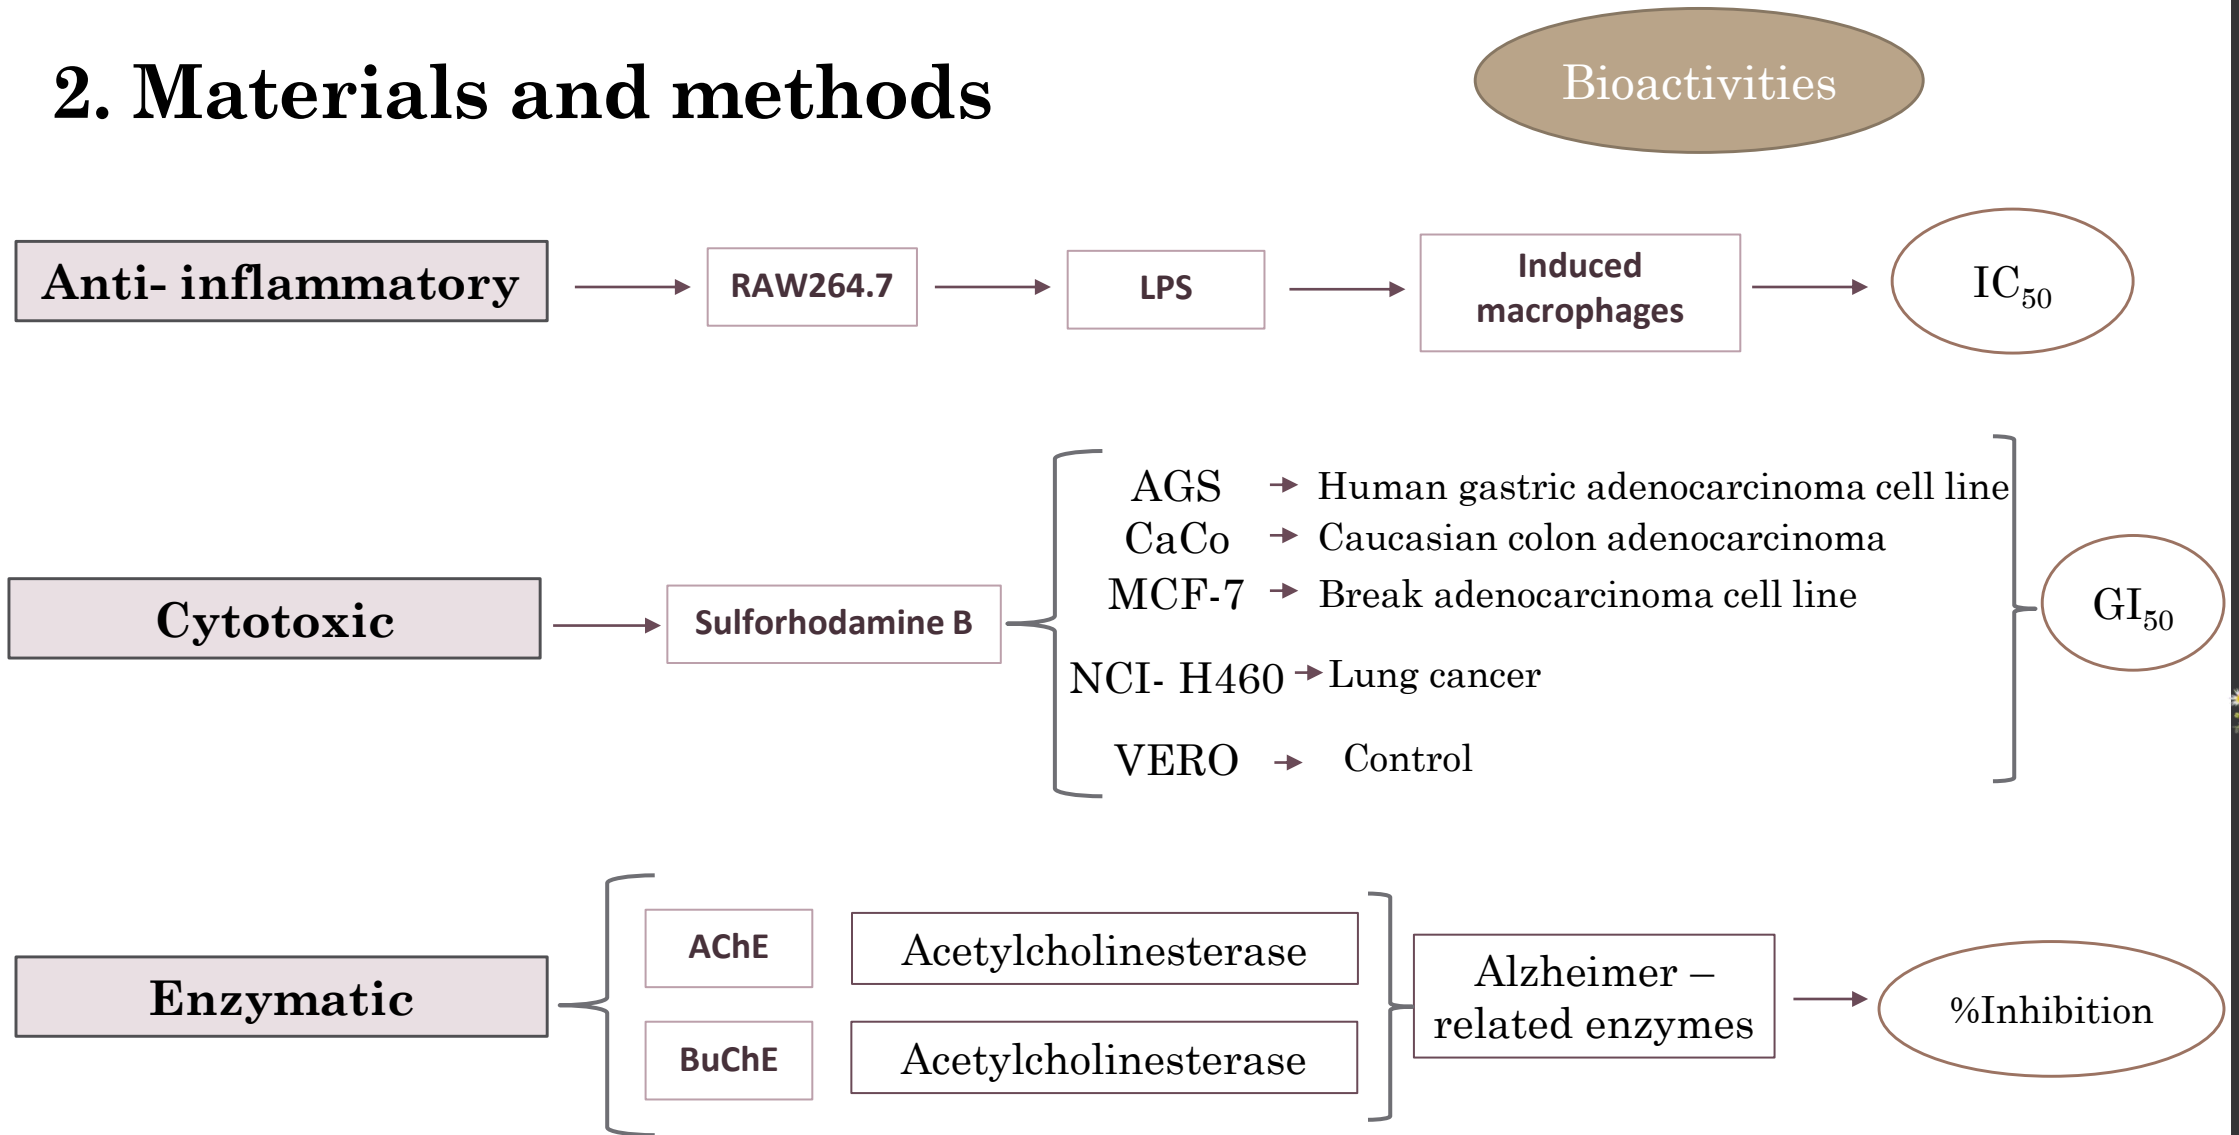

GI<sub>50</sub>: Inhibition of growth by 50%

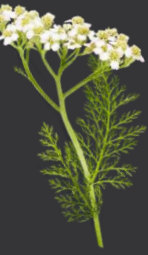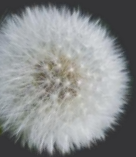

### 3. Results

Total phenolic content

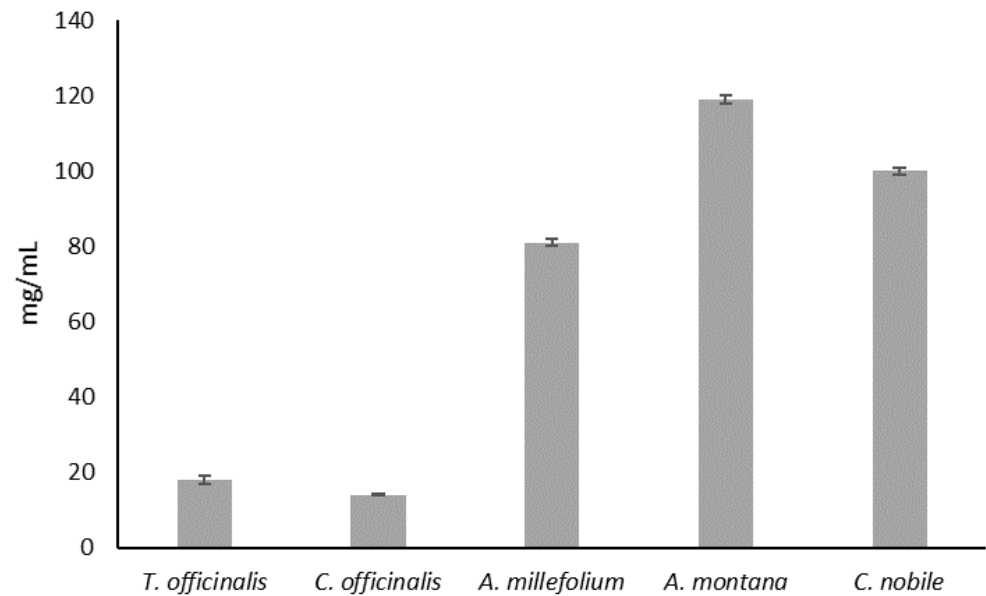

*A. montana* plant extracts showed the highest content of phenolic compounds (119 mg/mL), obtained by UPLC-DAD.

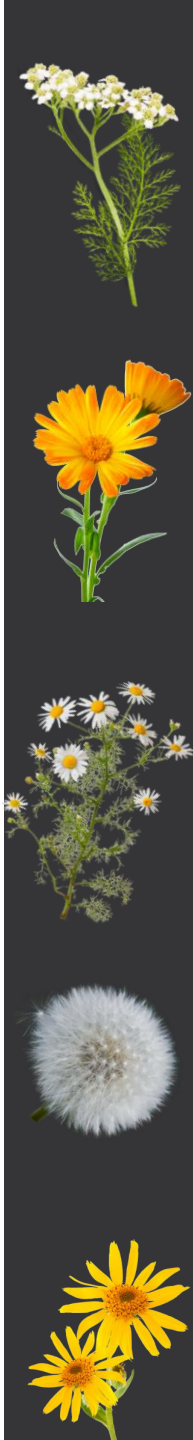



### 3. Results

Most representative phenolic compounds

*A. millefolium*

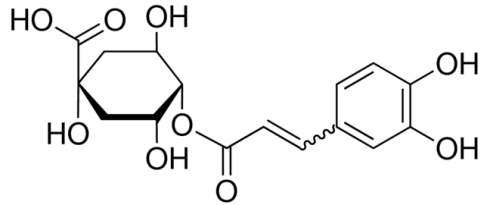

3-O-Caffeoylquinic acid

*A. montana*

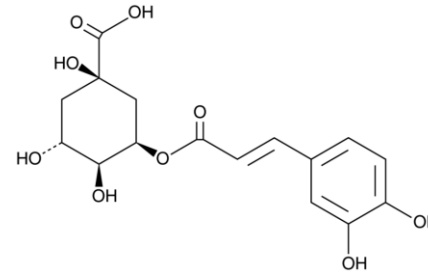

5-O-Caffeoylquinic acid

*C. officinalis*

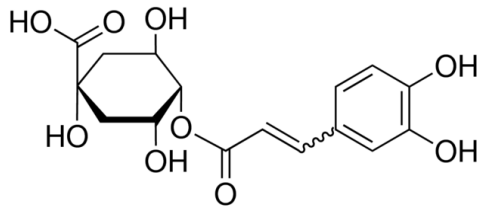

3-O-Caffeoylquinic acid

*C. nobile*

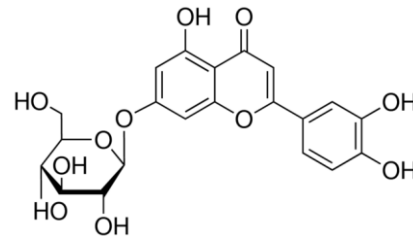

Luteolin-O-pentosylhexoside

*T. officinale*

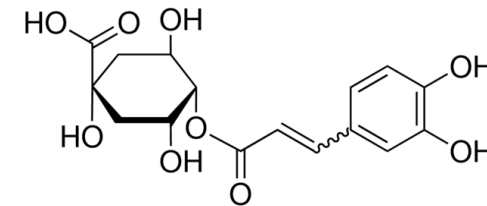

3-O-Caffeoylquinic acid

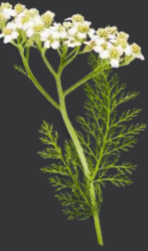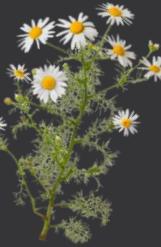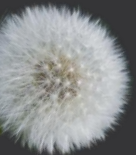



### 3. Results

Antioxidant activity

*A. millefolium* extracts presented an outstanding activity (0.013 mg/mL)

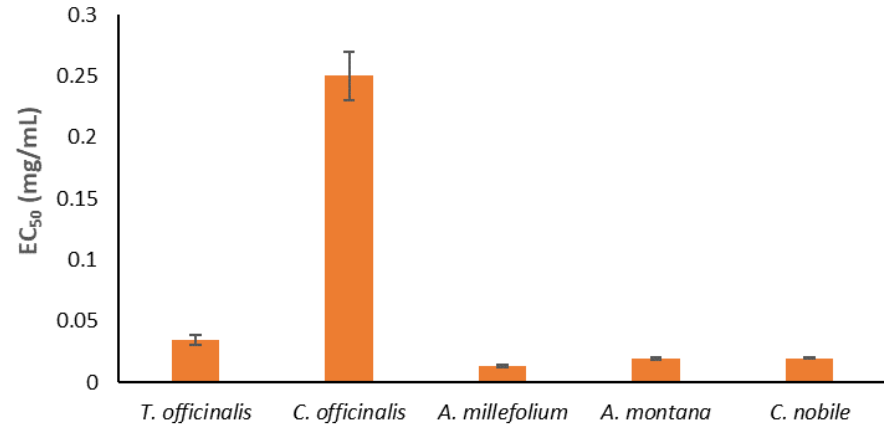

Antimicrobial and antifungal activity

| Antimicrobial activity                              | <i>T. officinalis</i> |     | <i>C. officinalis</i> |     | <i>A. millefolium</i> |     | <i>A. montana</i> |     | <i>C. nobile</i> |     | Controls |     |      |     |
|-----------------------------------------------------|-----------------------|-----|-----------------------|-----|-----------------------|-----|-------------------|-----|------------------|-----|----------|-----|------|-----|
|                                                     |                       |     |                       |     |                       |     |                   |     |                  |     | E211     |     | E224 |     |
|                                                     | MIC                   | MBC | MIC                   | MBC | MIC                   | MBC | MIC               | MBC | MIC              | MBC | MIC      | MBC | MIC  | MBC |
| <b>Gram-negative bacteria</b>                       |                       |     |                       |     |                       |     |                   |     |                  |     |          |     |      |     |
| <i>Escherichia coli</i>                             | 0.5                   | 1   | 0.25                  | 0.5 | 0.5                   | 1   | 0.5               | 1   | 0.5              | 1   | 1        | 2   | 0.5  | 1   |
| <i>Salmonella typhimurium</i>                       | 1                     | 2   | 0.5                   | 1   | 1                     | 2   | 0.5               | 1   | 0.5              | 1   | 1        | 2   | 1    | 1   |
| <i>Enterobacter cloacae</i>                         | 0.5                   | 1   | 0.5                   | 1   | 1                     | 2   | 0.5               | 1   | 0.5              | 1   | 2        | 4   | 0.5  | 0.5 |
| <b>Gram-positive bacteria</b>                       |                       |     |                       |     |                       |     |                   |     |                  |     |          |     |      |     |
| <i>Staphylococcus aureus</i>                        | 1                     | 2   | 0.25                  | 0.5 | 0.5                   | 1   | 0.5               | 1   | 0.5              | 1   | 4        | 4   | 1    | 1   |
| <i>Bacillus cereus</i>                              | 0.25                  | 0.5 | 0.25                  | 0.5 | 0.25                  | 0.5 | 0.25              | 0.5 | 0.25             | 0.5 | 0.5      | 0.5 | 2    | 4   |
| <i>Listeria monocytogenes</i>                       | 0.5                   | 1   | 0.25                  | 0.5 | 0.5                   | 1   | 0.5               | 1   | 1                | 0.5 | 1        | 2   | 1    | 0.5 |
| <b>Yeasts</b>                                       |                       |     |                       |     |                       |     |                   |     |                  |     |          |     |      |     |
| <i>Aspergillus fumigatus</i>                        | 2                     | 4   | 0.5                   | 1   | 2                     | 4   | 0.5               | 1   | 0.5              | 1   | 1        | 2   | 1    | 1   |
| <i>Aspergillus niger</i>                            | 2                     | 4   | 0.5                   | 1   | 2                     | 4   | 1                 | 2   | 0.5              | 1   | 1        | 2   | 1    | 1   |
| <i>Aspergillus versicolor</i>                       | 2                     | 4   | 0.5                   | 1   | 2                     | 4   | 0.5               | 1   | 0.5              | 1   | 1        | 2   | 0.5  | 0.5 |
| <i>Penicillium funiculosum</i>                      | 2                     | 4   | 0.5                   | 1   | 2                     | 4   | 0.5               | 1   | 0.5              | 1   | 1        | 2   | 0.5  | 0.5 |
| <i>Trichoderma viride</i>                           | 0.25                  | 0.5 | 0.25                  | 0.5 | 1                     | 2   | 0.5               | 1   | 0.25             | 0.5 | 1        | 2   | 0.5  | 0.5 |
| <i>Penicillium verrucosum</i> var. <i>cyclopium</i> | 2                     | 4   | 0.5                   | 1   | 2                     | 4   | 0.5               | 1   | 0.5              | 1   | 2        | 4   | 1    | 1   |

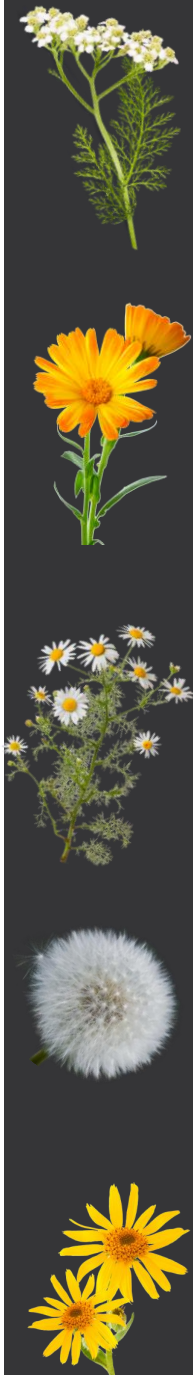

### 3. Results

Anti-inflammatory activity

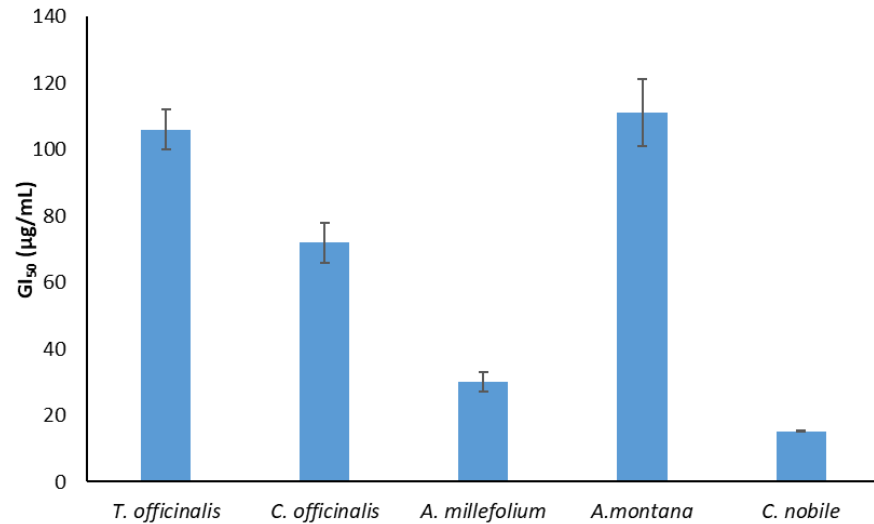

Cytotoxic activity

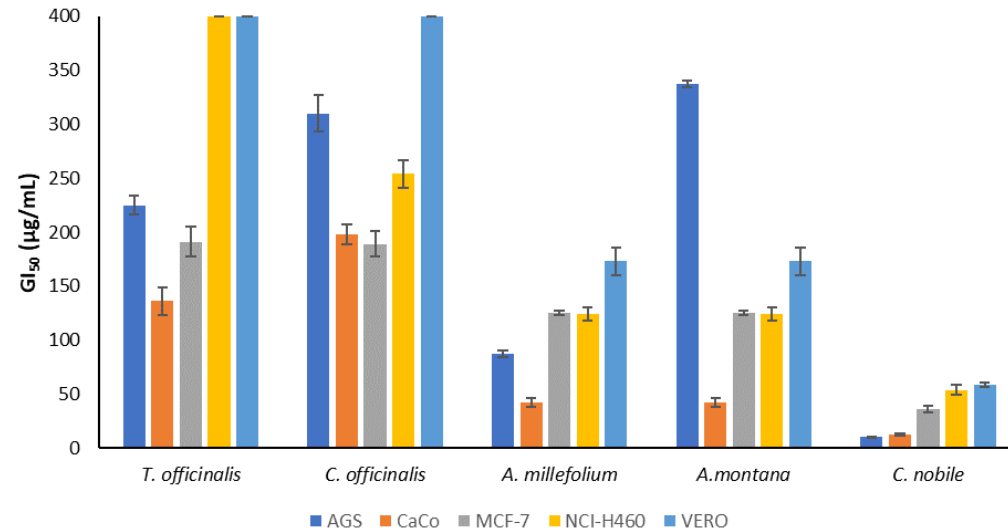

*C. nobile* extracts showed the greatest effect compared to the rest, with a growth inhibitory 50 concentrations (GI<sub>50</sub>) values of 15.2±0.1 µg/mL for the anti-inflammatory activity, and GI<sub>50</sub> values between 54 and 10.3 µg/mL, in the case of cytotoxic activity.

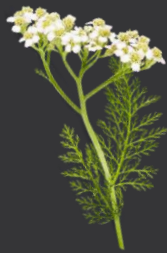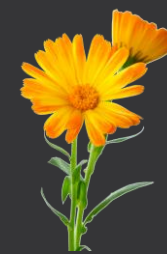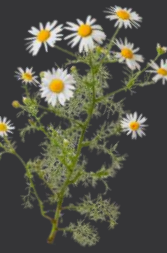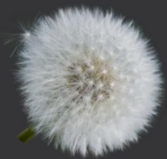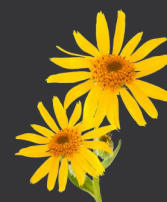

# 3. Results

## Enzyme activity

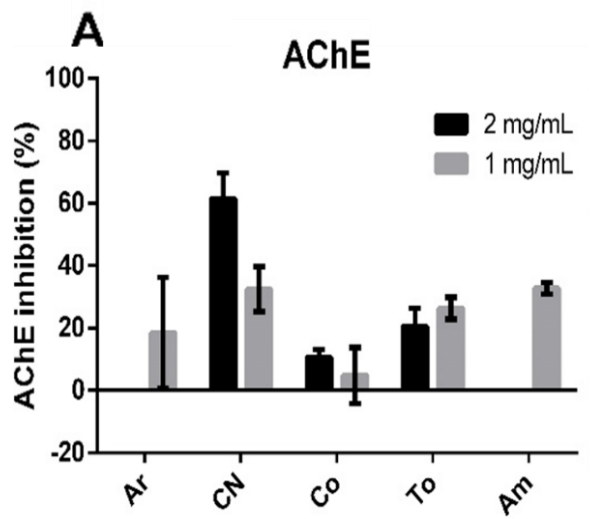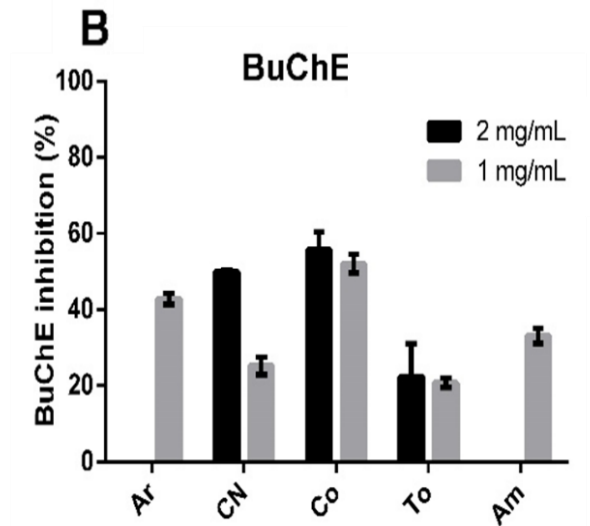

*C. nobile* and *C. officinalis* extracts showed the greatest inhibitory effects on two enzymes related to Alzheimer's disease, acetylcholinesterase (AChE) and butyrylcholinesterase (BuChE)



## 4. Conclusion

- ❑ Each of the plants showed some activity:
  - *A. millefolium* showed high antioxidant activity.
  - *C. officinalis* had the highest rate of antimicrobial and antifungal activities.
  - In the case of anti-inflammatory and cytotoxic activities, the extracts of *C. nobile* showed the highest anti-inflammatory and cytotoxic activity.
  - Extracts of *A. montana* showed the highest content of phenolic compounds
  - In enzyme assays, both *C. nobile* and *C. officinalis* extracts showed the highest inhibitory effects.
  
- ❑ This study provides scientific evidence to the assessment of the potential of medicinal plant extracts for the development of new products.

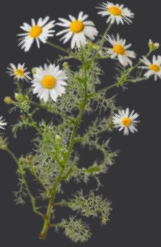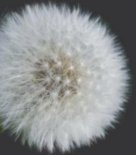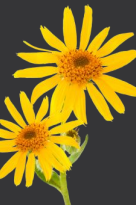

# ACKNOWLEDGEMENTS

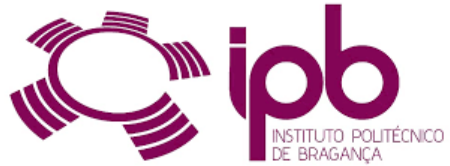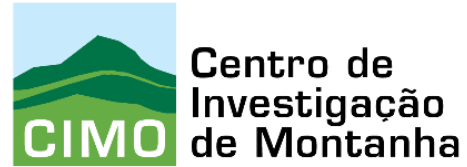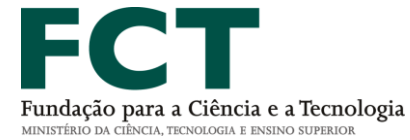

Universidade de Vigo

**Thank you for your attention**

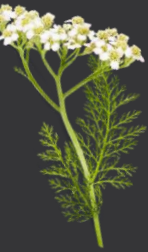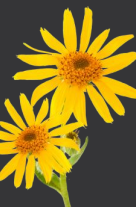

Supplement: s1 [file s1]
